# Supplementary material
Source: PubMed Central journal article supplement (PMC3592543)
Supplement: SD4.pdf [file SD4.pdf]

SUPPLEMENTAL TABLE S1

Model selection for factors explaining the infection rate at Trinidad de las Minas, Panamá

Model Structure indicates the variables considered in the generalized Poisson rate models, \* indicates if interaction among variables were considered, + that variables were considered additively. AIC indicates the value of the Akaike Information criterion. In the table the minimum AIC model is **bolded**.

| Model Structure                                                                                                                      | AIC          |
|--------------------------------------------------------------------------------------------------------------------------------------|--------------|
| Ecological index (EI)*Peridomiciliary index (PI) * Domiciliary index (DI) * Domiciliary and Peridomiciliary Sand Fly Abundance (SFA) | 86.18        |
| EI*PI*DI*Domiciliary Sand Fly Abundance (DSFA)                                                                                       | 89.19        |
| EI*PI*DI*Peridomiciliary Sand Fly Abundance (PSFA)                                                                                   | 89.20        |
| PI*DI*SFA                                                                                                                            | 73.77        |
| PI*DI*DSFA                                                                                                                           | 77.16        |
| PI*DI*PSFA                                                                                                                           | 76.68        |
| EI*DI*SFA                                                                                                                            | 74.40        |
| EI*DI*DSFA                                                                                                                           | 75.34        |
| EI*DI*PSFA                                                                                                                           | 75.07        |
| (PI+DI)*SFA                                                                                                                          | 74.21        |
| (PI+DI)*DSFA                                                                                                                         | 73.92        |
| (PI+DI)*PSFA                                                                                                                         | 75.24        |
| (EI+DI)*SFA                                                                                                                          | 73.41        |
| (EI+DI)*DSFA                                                                                                                         | 72.04        |
| (EI+DI)*PSFA                                                                                                                         | 73.77        |
| PI+DI*SFA                                                                                                                            | 74.38        |
| PI+DI*DSFA                                                                                                                           | 72.12        |
| PI+DI*PSFA                                                                                                                           | 74.96        |
| EI+DI*SFA                                                                                                                            | 71.42        |
| EI+DI*DSFA                                                                                                                           | 70.81        |
| EI+DI*PSFA                                                                                                                           | 71.81        |
| DI+PI*SFA                                                                                                                            | 72.25        |
| DI+PI*DSFA                                                                                                                           | 73.34        |
| DI+PI*PSFA                                                                                                                           | 73.26        |
| DI+EI*SFA                                                                                                                            | 72.06        |
| DI+EI*DSFA                                                                                                                           | 72.27        |
| DI+EI*PSFA                                                                                                                           | 72.15        |
| PI+EI+DI+SFA                                                                                                                         | 72.09        |
| PI+EI+DI+DSFA                                                                                                                        | 72.38        |
| PI+EI+DI+PSFA                                                                                                                        | 72.19        |
| PI+DI+SFA                                                                                                                            | 73.35        |
| PI+DI*DSFA                                                                                                                           | 71.89        |
| PI+DI*PSFA                                                                                                                           | 73.65        |
| EI+DI+SFA                                                                                                                            | 70.15        |
| EI+DI*DSFA                                                                                                                           | 70.54        |
| EI+DI*PSFA                                                                                                                           | 70.25        |
| PI*SFA                                                                                                                               | 71.88        |
| PI*DSFA                                                                                                                              | 71.99        |
| PI*PSFA                                                                                                                              | 73.21        |
| EI*SFA                                                                                                                               | 73.04        |
| EI*DSFA                                                                                                                              | 72.55        |
| EI*PSFA                                                                                                                              | 73.18        |
| DI*SFA                                                                                                                               | 72.38        |
| DI*DSFA                                                                                                                              | 70.14        |
| DI*PSFA                                                                                                                              | 72.96        |
| PI+SFA                                                                                                                               | 72.7         |
| PI*DSFA                                                                                                                              | 70.61        |
| PI*PSFA                                                                                                                              | 73.07        |
| EI+SFA                                                                                                                               | 71.05        |
| EI*DSFA                                                                                                                              | 70.61        |
| EI*PSFA                                                                                                                              | 71.40        |
| DI+SFA                                                                                                                               | 71.37        |
| DI*DSFA                                                                                                                              | 69.97        |
| DI*PSFA                                                                                                                              | 71.67        |
| DI                                                                                                                                   | 70.48        |
| PI                                                                                                                                   | 71.78        |
| EI                                                                                                                                   | 71.44        |
| SFA                                                                                                                                  | 72.53        |
| <b>DSFA</b>                                                                                                                          | <b>69.96</b> |
| PSFA                                                                                                                                 | 70.98        |
